# Supplementary material for: Sex differences in immune protection in mice conferred by heterologous vaccines for pneumonic plague
Source: PubMed Central journal article supplement (PMC11148226; doi:10.3389/fimmu.2024.1397579), 2024-05-21

## Supplementary Material

### Sex Differences in Immune Protection in Mice Conferred by Heterologous Vaccines for Pneumonic Plague

Michael L. Davies<sup>1</sup>, Sergei S. Biryukov<sup>1</sup>, Nathaniel O. Rill<sup>1</sup>, Christopher P. Klimko<sup>1</sup>, Melissa Hunter<sup>1</sup>, Jennifer L. Dankmeyer<sup>1</sup>, Jeremy A. Miller<sup>1</sup>, Jennifer L. Shoe<sup>1</sup>, Kevin D. Mlynek<sup>1</sup>, Yuli Talyansky<sup>1</sup>, Ronald G. Toothman<sup>1</sup>, Ju Qiu<sup>2</sup>, Joel A. Bozue<sup>1</sup>, Christopher K. Cote<sup>1\*</sup>

\* **Correspondence:** Christopher K. Cote: christopher.k.cote.civ@health.mil

Supplementary Data

#### 1.1 Supplementary Tables

Supplementary Tables 1-10 are in separate tabs of the accompanying Excel file.

#### 1.2 Supplementary Figures

**Supplementary Figure 1. Median lethal dose (LD<sub>50</sub>) estimations for *Y. pestis* C12 aerosol challenge in male (black) and female (red) BALB/c mice.** LD<sub>50</sub> values were estimated by probit regressions and graphing was performed in SAS version 9.4. The doses delivered to the male mice to calculate the LD<sub>50</sub> were approximately 2.13x10<sup>3</sup>, 1.57x10<sup>4</sup>, 3.18x10<sup>5</sup>, and 2.50x10<sup>6</sup> inhaled CFUs.

**Supplementary Figure 2. Examples of regression lines comparing tissue cytokine level to bacterial burden in male and female lungs.** The data in **Table 2** was natural log (ln)-transformed and plotted for linear regression. **(A)** In the regression using CFU/g to predict tissue G-CSF level, regression coefficients for females (F) were intercept: -0.10 and slope: 0.28. Regression coefficients for males (M) were intercept: -0.41 and slope: 0.29, statistically similar to females. **(B)** In the regression using CFU/g to predict tissue IL-13 level, regression coefficients for females were intercept: 3.42 and slope: -0.03. Regression coefficients for males were intercept: 1.60 and slope: 0.05, both significantly different from females based on the method of least squares.

**Supplementary Figure 3. Cytokine levels 3 dpi in lungs of mice immunized with  $\Delta$ cafI or  $\Delta$ yopD/ $\Delta$ cafI regimens and challenged with aerosolized *Y. pestis* C12.** The seven cytokines whose expression in lungs was not significantly correlated with bacterial burden in **Table 2** were plotted to look for differences between sexes and vaccine groups. **(A)** Cytokine levels were compared across groups of mice given  $\Delta$ cafI vaccine regimens and challenged with aerosolized C12 (4.7 x 10<sup>5</sup> CFU in females, 5.7 x 10<sup>5</sup> CFU in males). **(B)** Cytokine levels were compared across groups of mice given  $\Delta$ yopD/ $\Delta$ cafI vaccine regimens and challenged with aerosolized C12 (2.0 x 10<sup>5</sup> CFU in females, 2.4 x 10<sup>5</sup> CFU in males). Graphs show each data point and lines representing geometric means. \*  $p < 0.05$  in Mann-Whitney test comparing males and females in same immunization group.

**Supplementary Figure 4. Serum levels of complement proteins in mice vaccinated with  $\Delta$ cafI and  $\Delta$ yopD/ $\Delta$ cafI regimens and challenged with aerosolized *Y. pestis* C12.** Three dpi, male (M)

and female (F) mice were euthanized; lung and spleen homogenates were plated to quantify bacteria (CFU/g), and ELISA was used to measure serum samples for the anaphylatoxin C3a (**A-C**) and C5b-9 soluble membrane attack complex (**D-F**). Serum complement protein level for each mouse was plotted against bacterial burden in lungs (**A,B**) and spleens (**D,E**). Females and males sham-vaccinated with PBS, and females and males that received any of the heterologous vaccine regimens, were compared for serum levels of C3a (**C**) and C5b-9 (**F**). \*\*  $p < 0.01$  in Mann-Whitney test.

**Supplementary Figure 5. ELISpot assays for IFN- $\gamma$ -secreting splenocytes from mice given  $\Delta$ *caf1* and  $\Delta$ *yopD*/ $\Delta$ *caf1* vaccine regimens, after *ex vivo* re-stimulation with *Y. pestis* antigens.**

Four weeks post-boost, female (red) and male (blue) mice were euthanized and splenocytes re-stimulated for 24 h with rF1-V (**A,E**), rV (**B,F**), or temperature-shifted whole-cell CO92 (**C,G**) and C12 (**D,H**) antigens, followed by quantification of spots representing cells secreting IFN- $\gamma$ . Splenocytes from mice given  $\Delta$ *caf1* vaccine regimens are shown in **A-D**; splenocytes from mice given  $\Delta$ *yopD*/ $\Delta$ *caf1* vaccine regimens are shown in **E-H**. Graphs show each data point and lines representing geometric means. \*  $p < 0.05$ , \*  $p < 0.01$ , \*  $p < 0.001$  in Mann-Whitney test.

**Supplementary Figure 6. Sample gating strategy for upregulation of CD44 surface expression.**

Cryopreserved splenocytes were thawed, incubated with 1:200 Mouse FcBlock, stained with surface antibody cocktail, and fixed in 2% formaldehyde. Samples were run on a FACSCanto II and data analyzed in FlowJo v10.8.

**Supplementary Figure 1. Median lethal dose (LD<sub>50</sub>) estimations for *Y. pestis* C12 aerosol challenge in male (black) and female (red) BALB/c mice.** LD<sub>50</sub> values were estimated by probit regressions and graphing was performed in SAS version 9.4. The doses delivered to the male mice to calculate the LD<sub>50</sub> were approximately 2.13x10<sup>3</sup>, 1.57x10<sup>4</sup>, 3.18x10<sup>5</sup>, and 2.50x10<sup>6</sup> inhaled CFUs.

### Probit Analysis of YP C12 Data

Probability of death by Log dose  
By sex

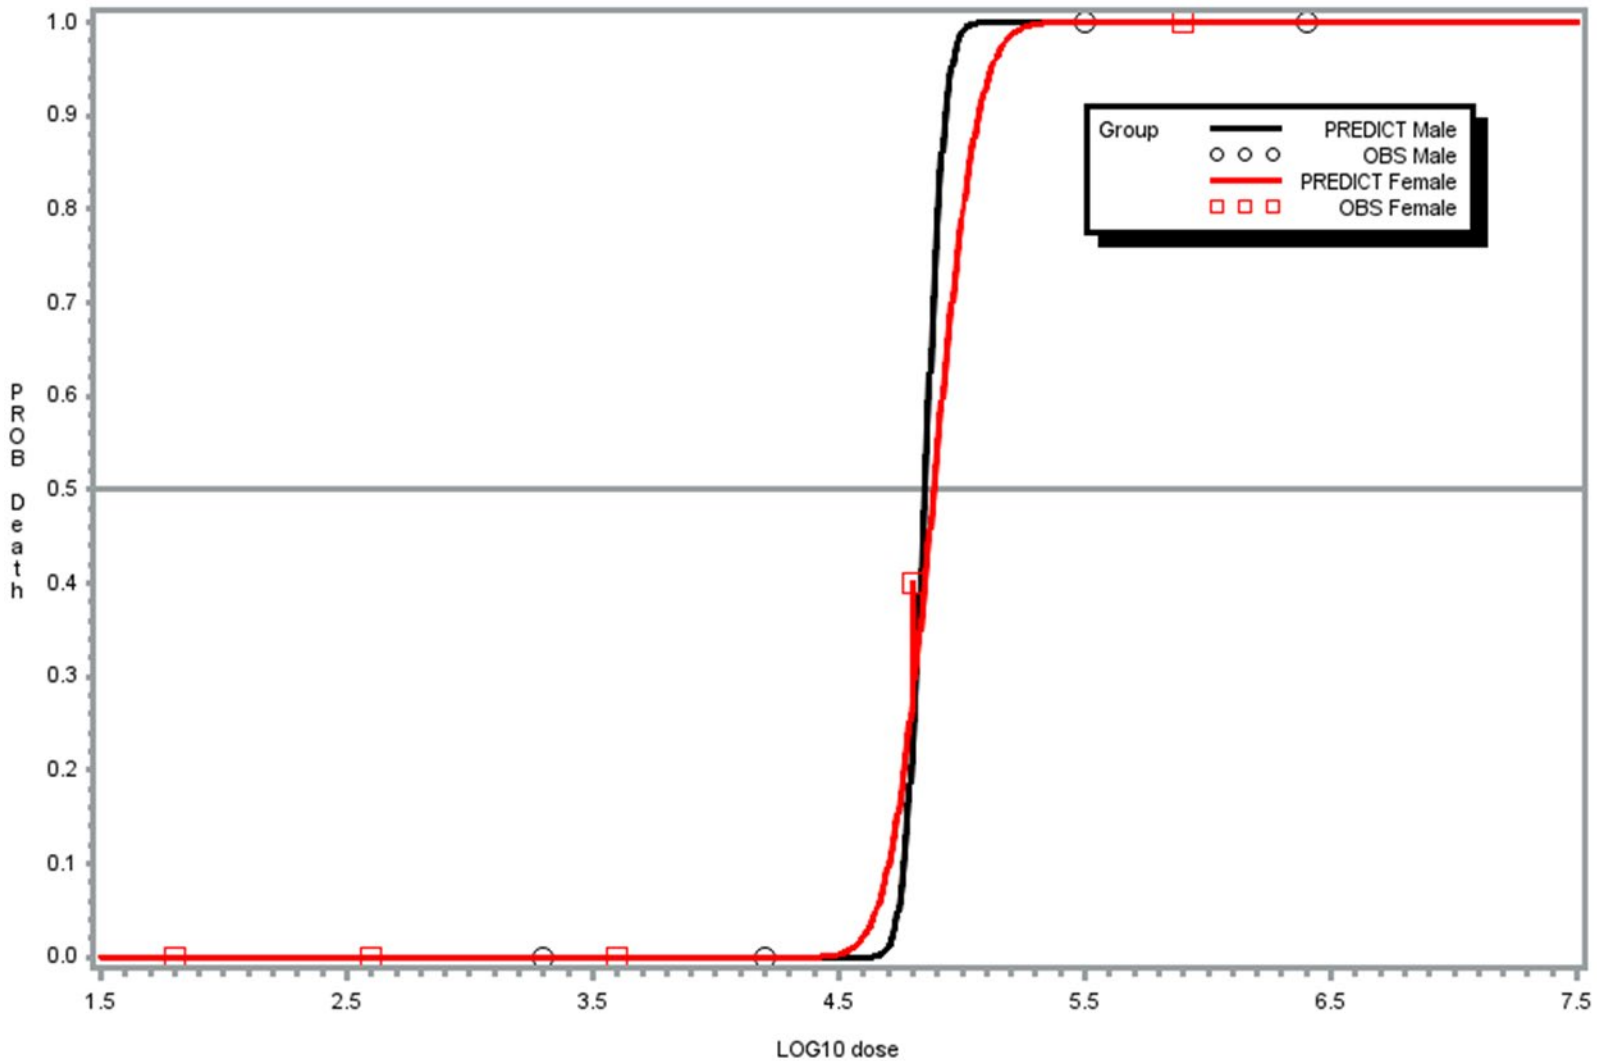

**Supplementary Figure 2. Examples of regression lines comparing tissue cytokine level to bacterial burden in male and female lungs.** The data in **Table 2** was natural log (ln)-transformed and plotted for linear regression. **(A)** In the regression using CFU/g to predict tissue G-CSF level, regression coefficients for females (F) were intercept: -0.10 and slope: 0.28. Regression coefficients for males (M) were intercept: -0.41 and slope: 0.29, statistically similar to females. **(B)** In the regression using CFU/g to predict tissue IL-13 level, regression coefficients for females were intercept: 3.42 and slope: -0.03. Regression coefficients for males were intercept: 1.60 and slope: 0.05, both significantly different from females based on the method of least squares.

**A**

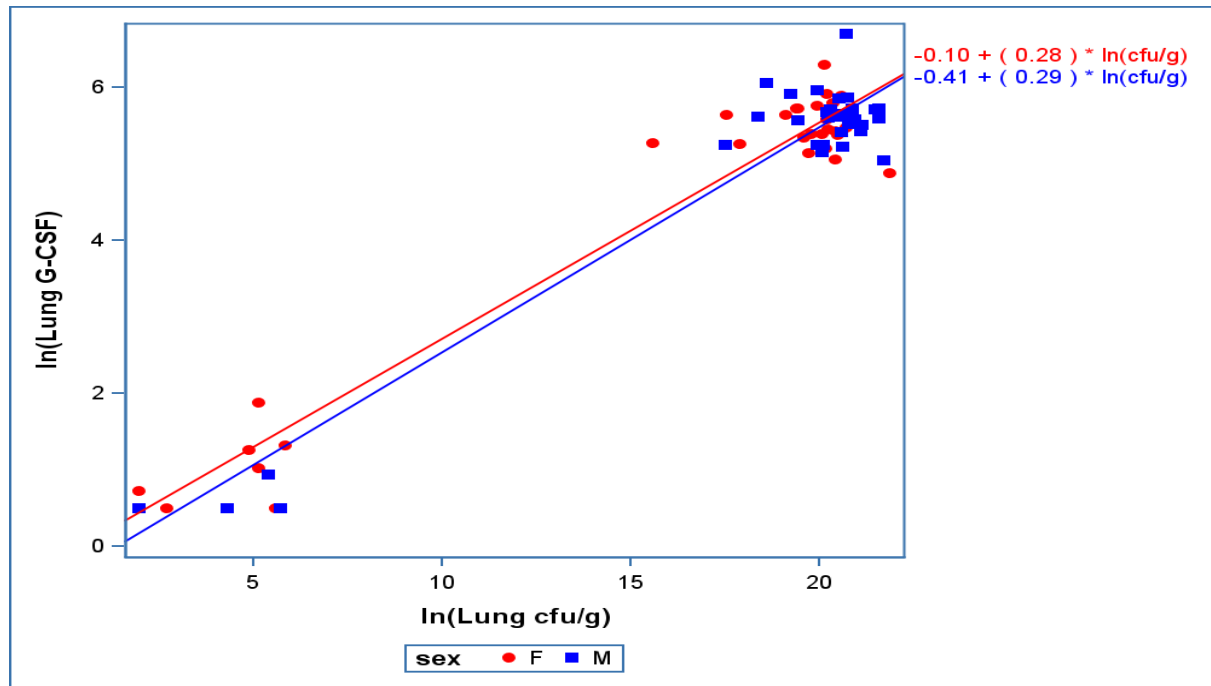

**B**

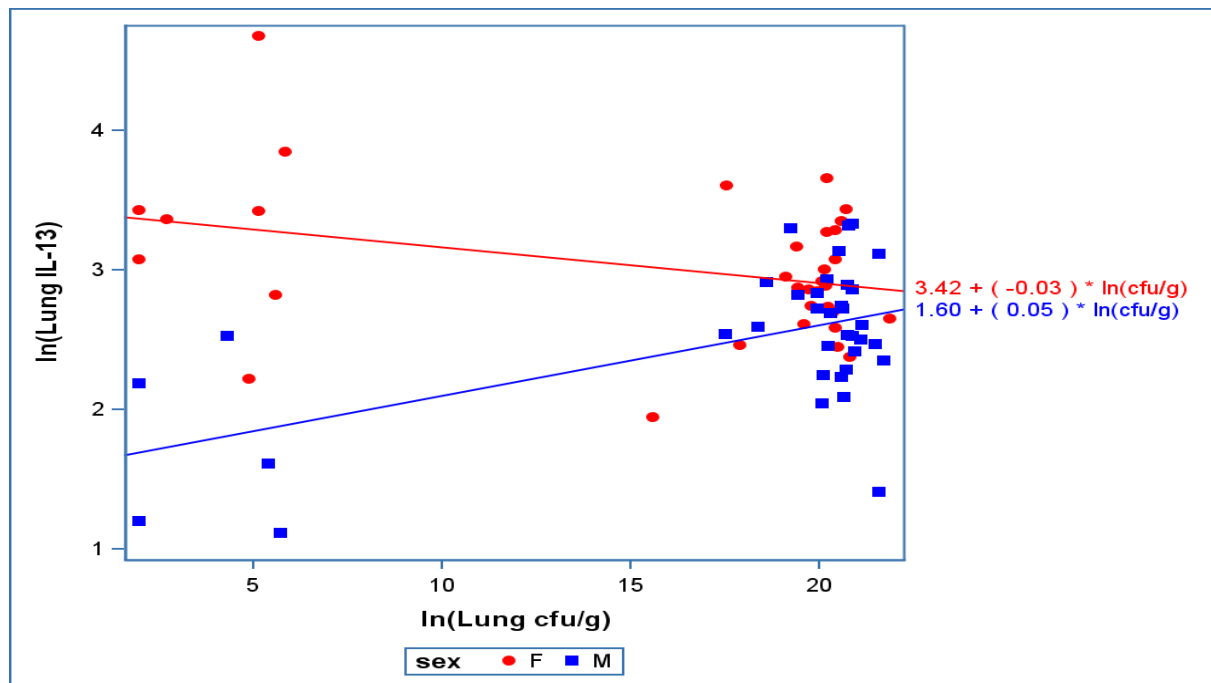

**Supplementary Figure 3. Cytokine levels 3 dpi in lungs of mice immunized with  $\Delta$ caf1 or  $\Delta$ yopD/ $\Delta$ caf1 regimens and challenged with aerosolized *Y. pestis* C12.** The seven cytokines whose expression in lungs was not significantly correlated with bacterial burden in **Table 2** were plotted to look for differences between sexes and vaccine groups. **(A)** Cytokine levels were compared across groups of mice given  $\Delta$ caf1 vaccine regimens and challenged with aerosolized C12 ( $4.7 \times 10^5$  CFU in females,  $5.7 \times 10^5$  CFU in males). **(B)** Cytokine levels were compared across groups of mice given  $\Delta$ yopD/ $\Delta$ caf1 vaccine regimens and challenged with aerosolized C12 ( $2.0 \times 10^5$  CFU in females,  $2.4 \times 10^5$  CFU in males). Graphs show each data point and lines representing geometric means. \*  $p < 0.05$  in Mann-Whitney test comparing males and females in same immunization group.

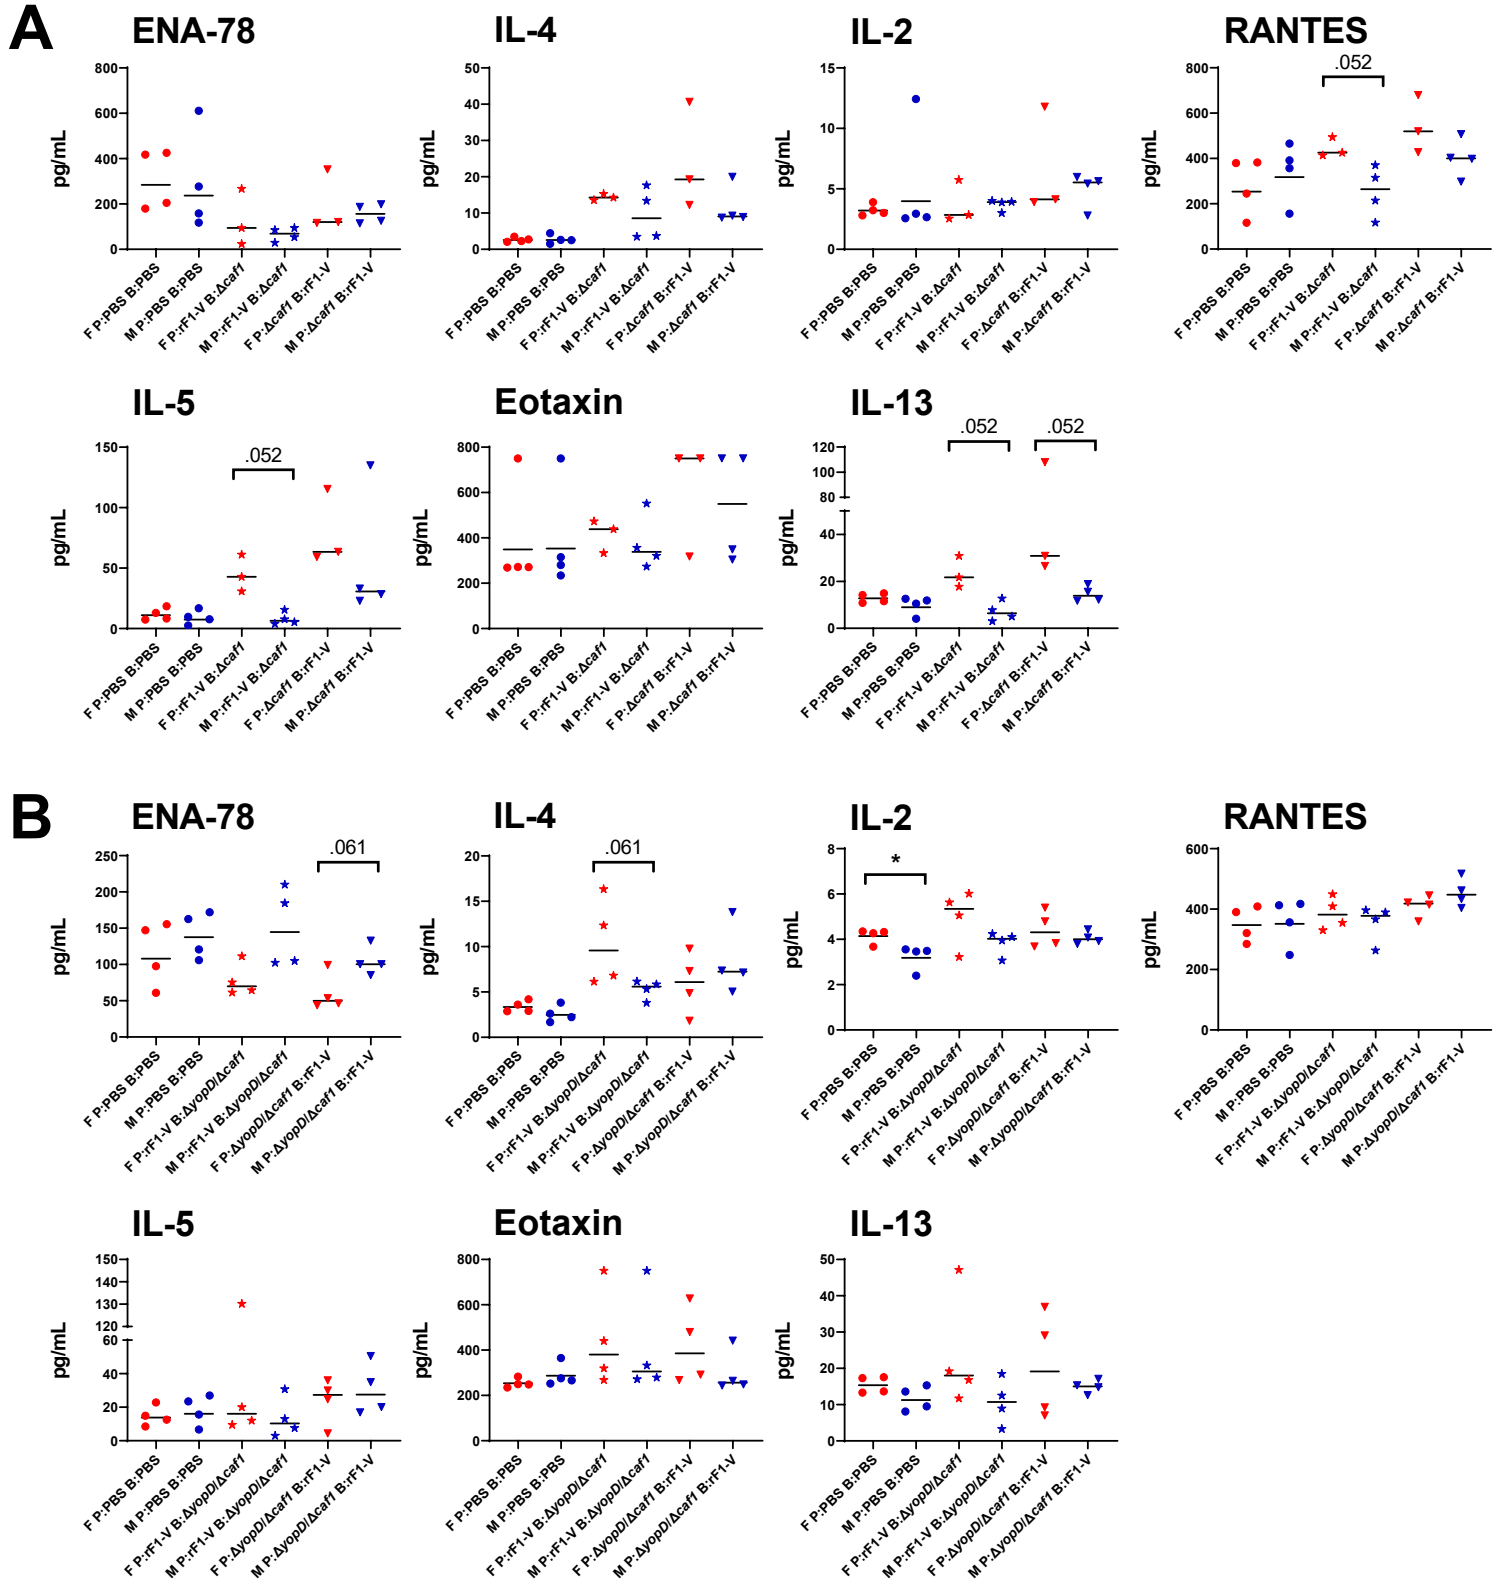

**Supplementary Figure 4. Serum levels of complement proteins in mice vaccinated with  $\Delta$ caf1 and  $\Delta$ yopD/ $\Delta$ caf1 regimens and challenged with aerosolized *Y. pestis* C12. Three dpi, male (M) and female (F) mice were euthanized; lung and spleen homogenates were plated to quantify bacteria (CFU/g), and ELISA was used to measure serum samples for the anaphylatoxin C3a (A-C) and C5b-9 soluble membrane attack complex (D-F). Serum complement protein level for each mouse was plotted against bacterial burden in lungs (A,B) and spleens (D,E). Females and males sham-vaccinated with PBS, and females and males that received any of the heterologous vaccine regimens, were compared for serum levels of C3a (C) and C5b-9 (F). \*\*  $p < 0.01$  in Mann-Whitney test.**

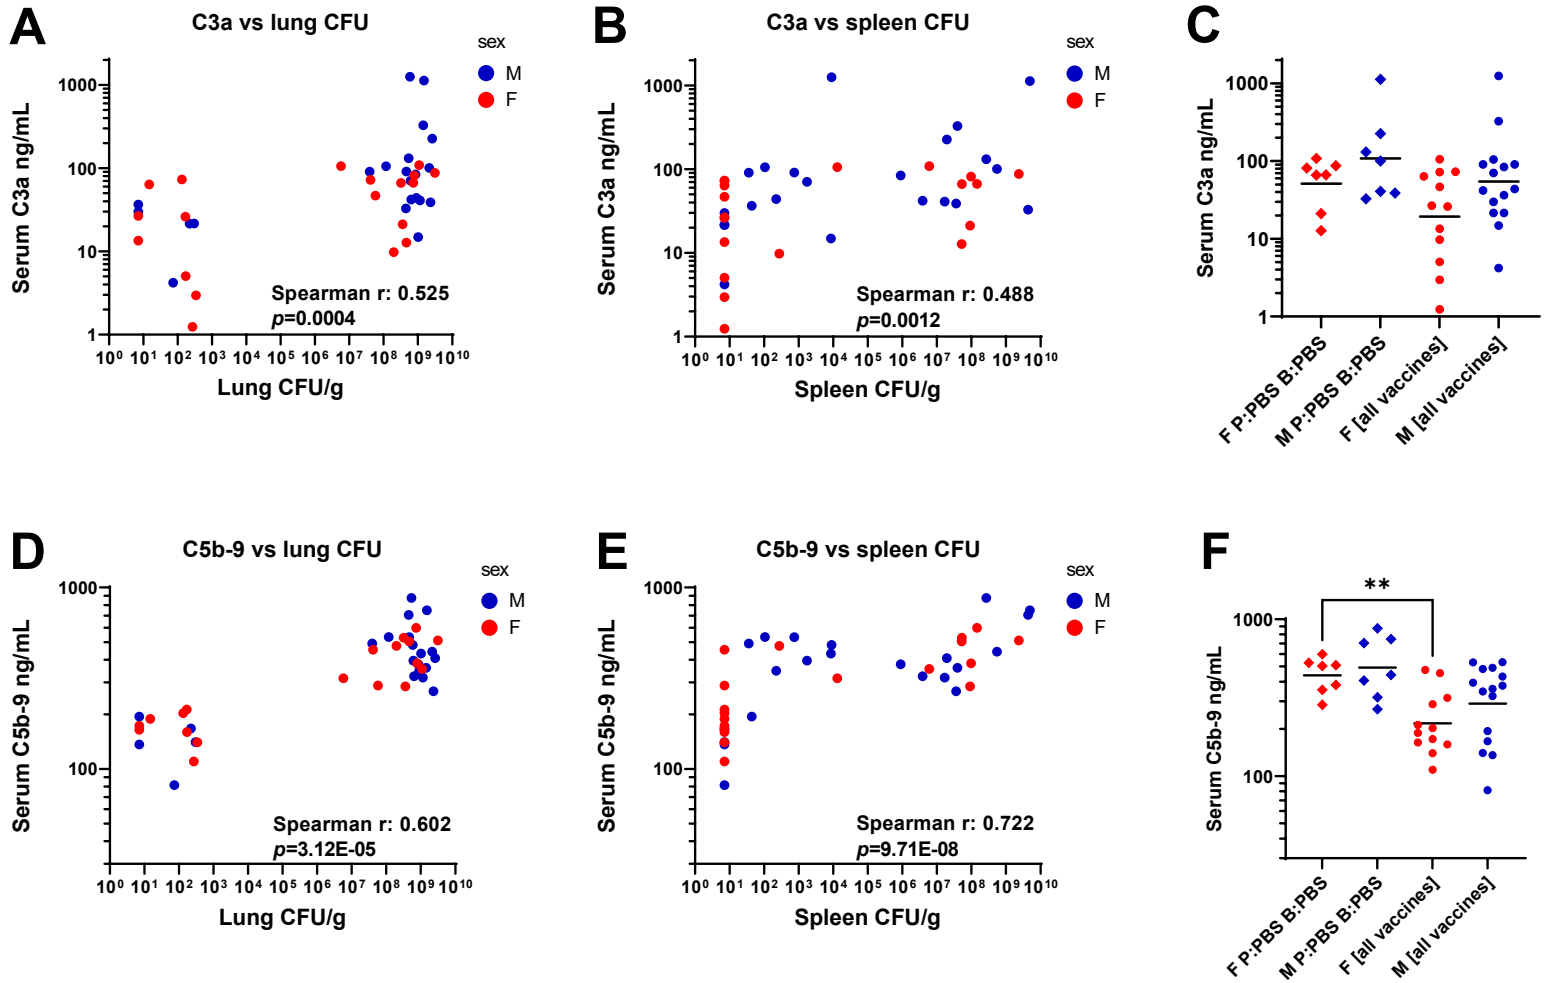

**Supplementary Figure 5. ELISpot assays for IFN- $\gamma$ -secreting splenocytes from mice given  $\Delta$ caf1 and  $\Delta$ yopD/ $\Delta$ caf1 vaccine regimens, after *ex vivo* re-stimulation with *Y. pestis* antigens.** Four weeks post-boost, female (red) and male (blue) mice were euthanized and splenocytes re-stimulated for 24 h with rF1-V (A,E), rV (B,F), or temperature-shifted whole-cell CO92 (C,G) and C12 (D,H) antigens, followed by quantification of spots representing cells secreting IFN- $\gamma$ . Splenocytes from mice given  $\Delta$ caf1 vaccine regimens are shown in A-D; splenocytes from mice given  $\Delta$ yopD/ $\Delta$ caf1 vaccine regimens are shown in E-H. Graphs show each data point and lines representing geometric means. \*  $p < 0.05$ , \*  $p < 0.01$ , \*  $p < 0.001$  in Mann-Whitney test.

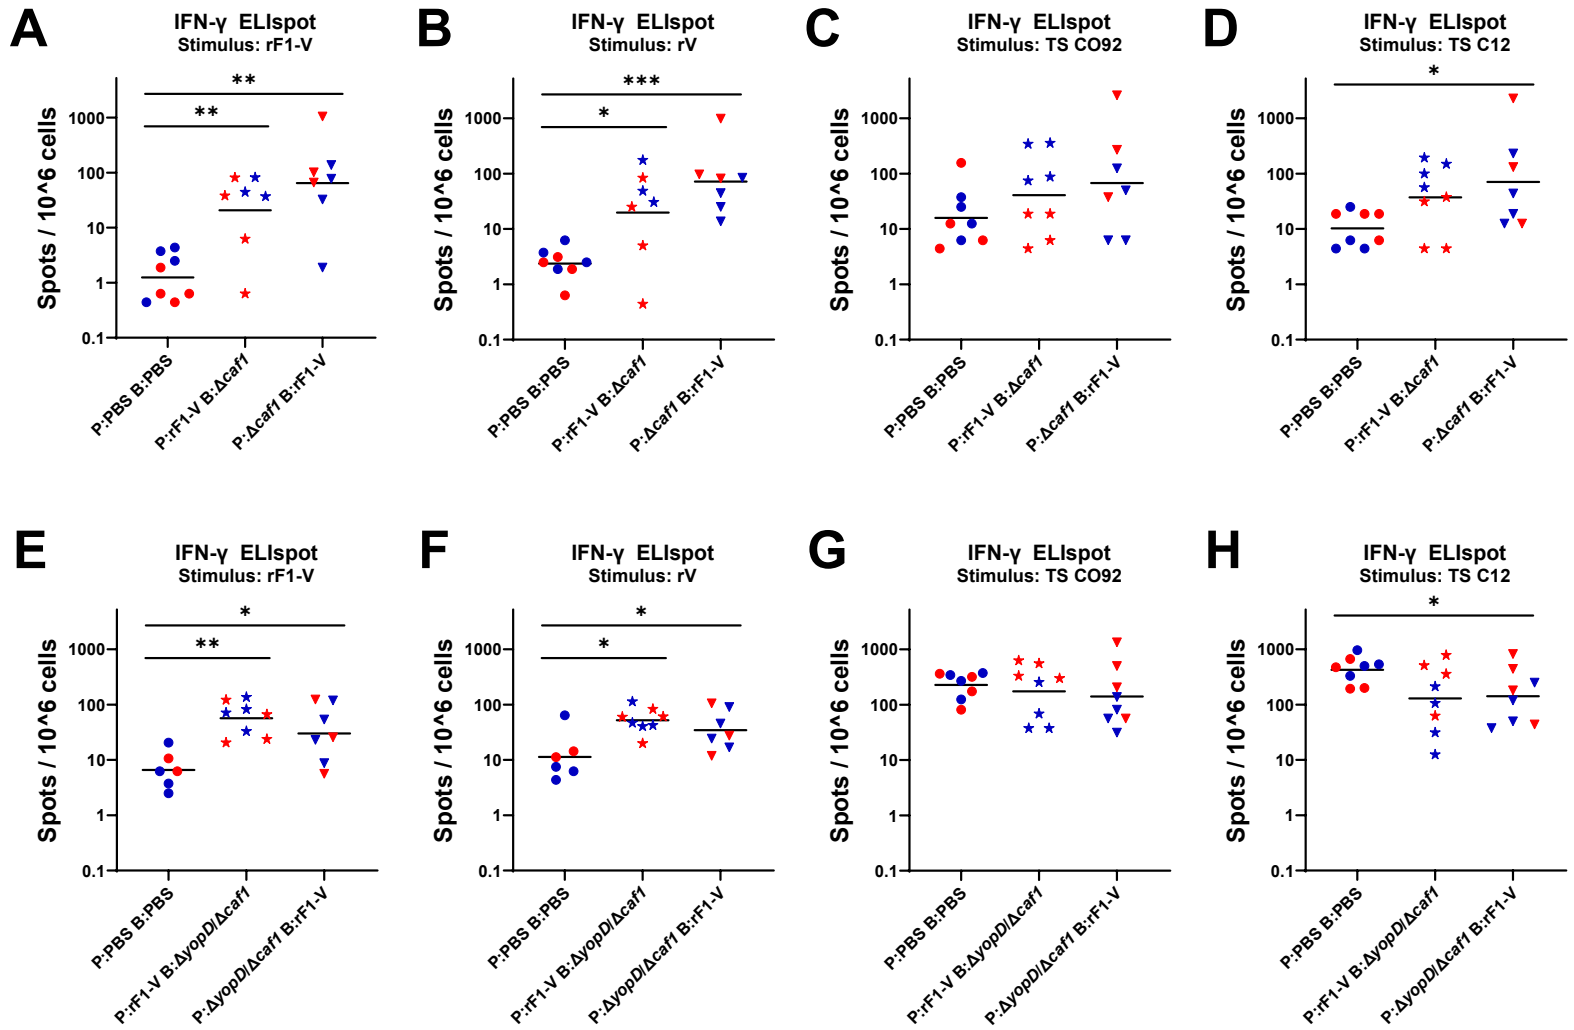

**Supplementary Figure 6. Sample gating strategy for upregulation of CD44 surface expression.** Cryopreserved splenocytes were thawed, incubated with 1:200 Mouse FcBlock, stained with surface antibody cocktail, and fixed in 2% formaldehyde. Samples were run on a FACSCanto II and data analyzed in FlowJo v10.8.

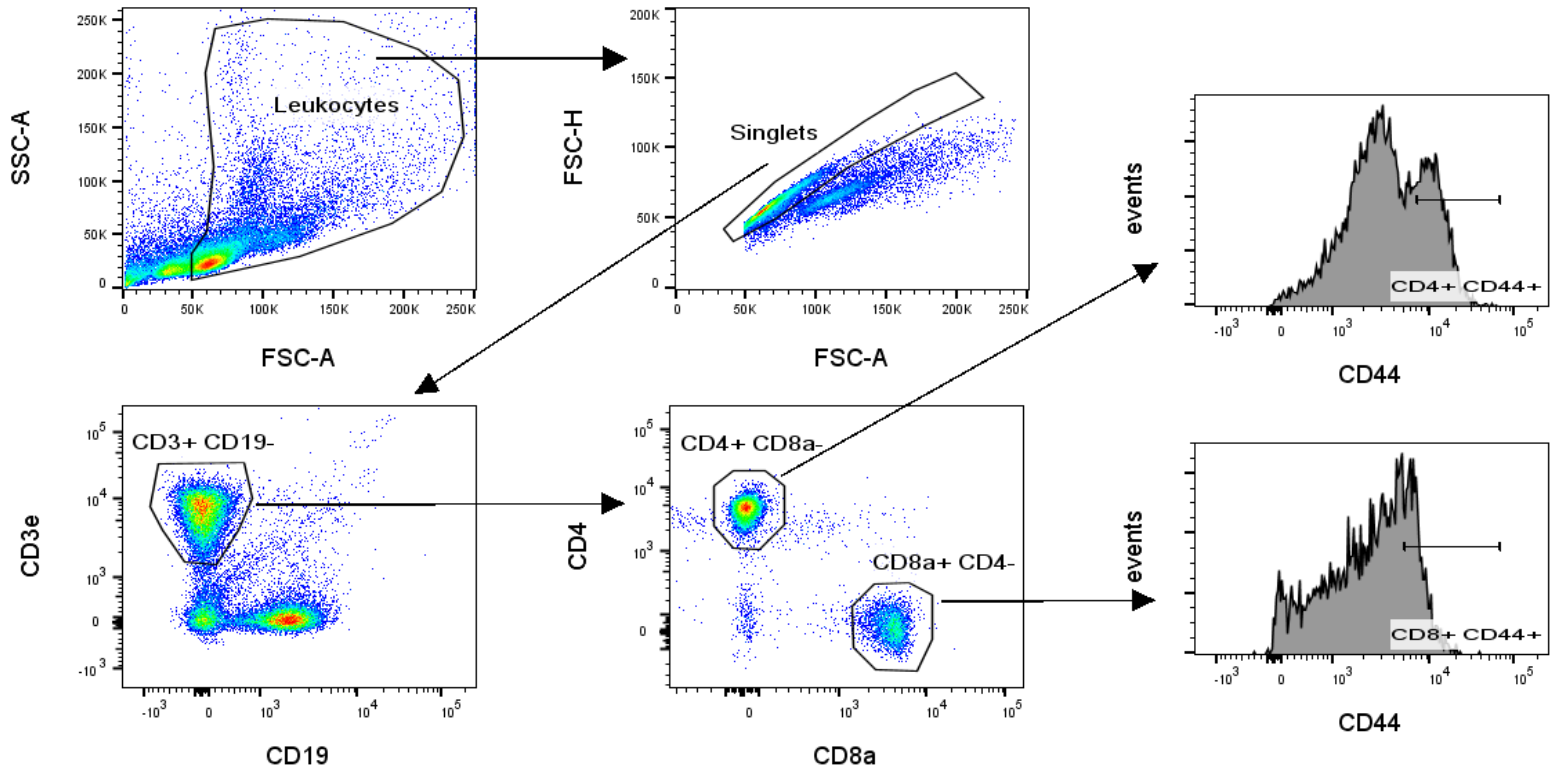

Supplement: DataSheet_1.pdf [file DataSheet_1.pdf]
